# Supplementary material for: Risk Factors Associated with HIV Acquisition in Males Participating in HIV Vaccine Efficacy Trials in South Africa
Source: Springer Nature journal article supplement (doi:10.1007/s10461-023-04025-z), 2023-03-16
Supplement: MOESM1 [file 24631448]

# Risk factors associated with HIV transmission in men participating in HIV vaccine trials in South Africa: the HVTN 702 Uhambo and HVTN 503 Phambili trials

13 December 2022

## Contents

|          |                                                            |          |
|----------|------------------------------------------------------------|----------|
| <b>1</b> | <b>CONSORT Diagram</b>                                     | <b>2</b> |
| <b>2</b> | <b>Summary of literature supporting multivariate model</b> | <b>3</b> |
| <b>3</b> | <b>Details of imputation procedure</b>                     | <b>3</b> |
| <b>4</b> | <b>Supplementary Tables</b>                                | <b>4</b> |
| <b>5</b> | <b>Super-learner methods and supplementary results</b>     | <b>7</b> |

# 1 CONSORT Diagram

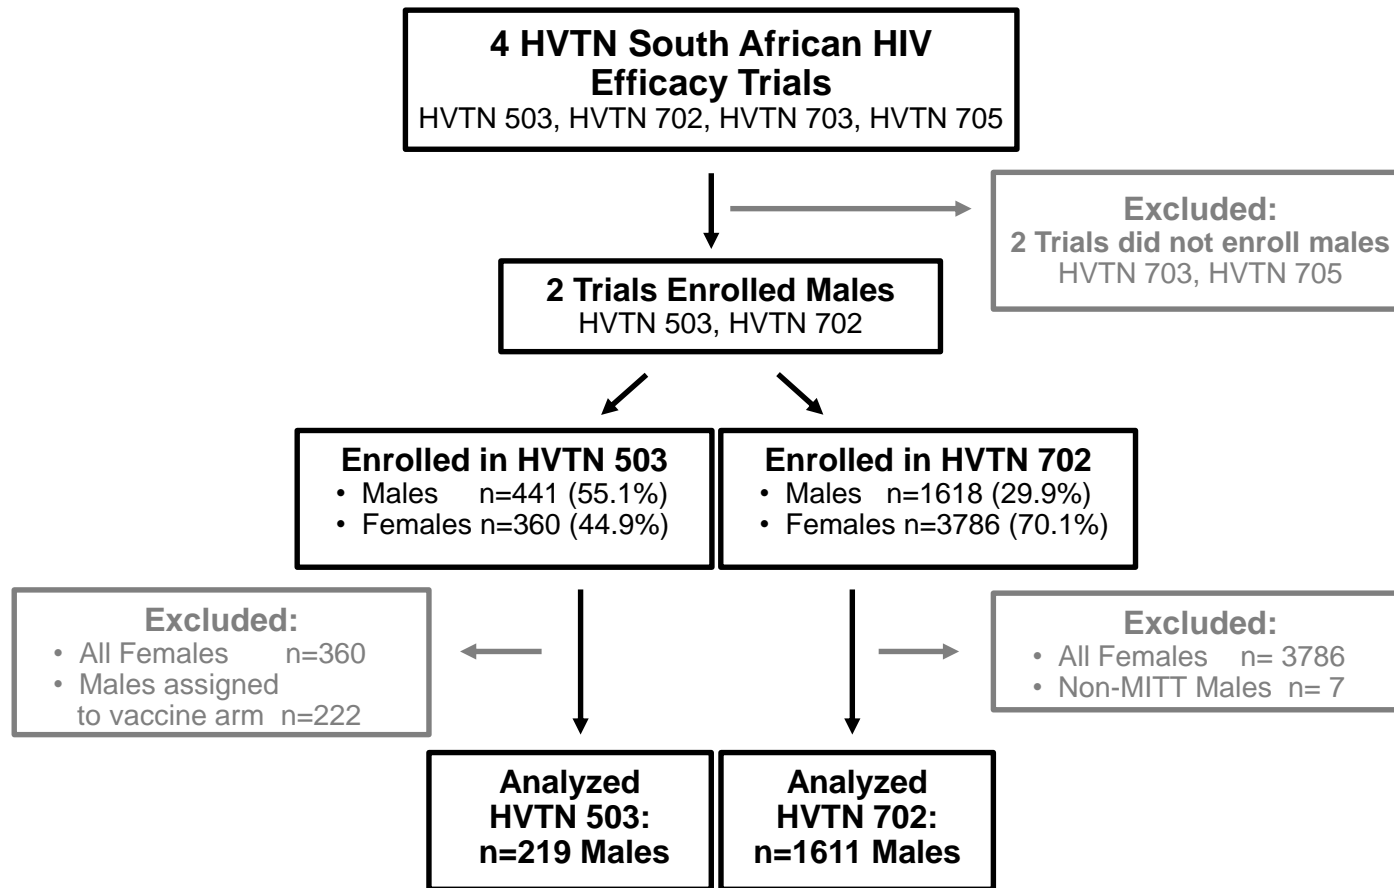

Figure S1: CONSORT diagram for the analysis population

## 2 Summary of literature supporting multivariate model

A literature review was conducted to assess prior evidence of HIV risk factors in African men. If a risk factor was found to be statistically significant predictor of HIV based on a multivariate model in at least two papers, it was added to the list of published risk factors. Published risk factors that were measured in HVTN 702 and 503 in some form - although not necessarily over the same time period or with the same categories - were included in the pre-specified multivariate model.

The table below lists the variables in the pre-specified multivariate model, and the papers that identified these as predictors of HIV in African men.

Table S1: Literature sources supporting variables included in the multivariate Cox model

| Risk.Factor                                     | Source                                                                                                                                                                                                             | Variable                        |
|-------------------------------------------------|--------------------------------------------------------------------------------------------------------------------------------------------------------------------------------------------------------------------|---------------------------------|
| Age                                             | Baral et al. BMC Public Health 2011<br>Giorgio et al. AIDS Behav. 2017<br>Sandfort et al. AIDS Behav. 2015<br>Govender et al. BMJ Open 2019<br>Jewkes et al. Int. Jrnl of Epi 2006<br>Lane et al. AIDS Behav. 2011 | Age                             |
| Number of sexual partners                       | Baral et al. BMC Public Health 2011<br>Sandfort et al. AIDS Behav. 2015<br>Lane et al. AIDS Behav. 2011                                                                                                            | Number of sexual partners       |
| Transactional sex                               | Baral et al. BMC Public Health 2011<br>Giorgio et al. AIDS Behav. 2017<br>Sandfort et al. AIDS Behav. 2015<br>Lane et al. AIDS Behav. 2011                                                                         | Exchange of sex for money/gifts |
| Unprotected anal sex                            | Lane et al. AIDS Behav. 2011<br>Rispel et al. J Acquir Immune Defic Syndr. 2011                                                                                                                                    | Anal sex                        |
| Alcohol use/hazardous drinking                  | Rehm et al. Addiction 2016<br>Giorgio et al. AIDS Behav. 2017                                                                                                                                                      | Sex with alcohol/drug use       |
| Not circumcised                                 | Govender et al. BMJ Open 2019<br>Jewkes et al. Int. Jrnl of Epi 2006                                                                                                                                               | Not circumcised                 |
| Sex with man or not identifying as heterosexual | Lane et al. AIDS Behav. 2011<br>Jewkes et al. Int. Jrnl of Epi 2006<br>Burrell et al. Sexual Health 2010<br>Rispel et al. J Acquir Immune Defic Syndr. 2011                                                        | Not identifying as heterosexual |
| Prevalent STI by self-report/diagnosis          | Burrell et al. Sexual Health 2010<br>Rispel et al. J Acquir Immune Defic Syndr. 2011                                                                                                                               | Prevalent STI diagnosis         |

## 3 Details of imputation procedure

Missing baseline variables were imputed using the R package ‘mice’. The package imputes categorical variables using polytomous regression, binary variables using logistic regression, and continuous variables using predictive mean matching. The entire set of baseline variables (Tables 1 and 2) and HIV outcomes was used as the basis for the imputation. A total of 100 imputed datasets were generated and results were combined across imputed datasets using Rubin’s rules.

## 4 Supplementary Tables

Table S2: Distribution of baseline variables among MITT males by heterosexual (collected in 702)/no male partner reported (collected in 503/503S) or not heterosexual/male partner(s) reported

| Category                                 | Not Heterosexual/Male Partner(s) | Heterosexual/No Male Partner |
|------------------------------------------|----------------------------------|------------------------------|
| MITT males                               | 194                              | 1636                         |
| Age, years                               |                                  |                              |
| 18-21                                    | 74 (38.14%)                      | 344 (21.03%)                 |
| 22-25                                    | 72 (37.11%)                      | 429 (26.22%)                 |
| 26-35                                    | 48 (24.74%)                      | 863 (52.75%)                 |
| Median (25%ile, 75%ile)                  | 22 (20, 25)                      | 26 (22, 30)                  |
| Race                                     |                                  |                              |
| Asian                                    | 0 (0.00%)                        | 1 (0.06%)                    |
| Black                                    | 189 (97.42%)                     | 1613 (98.59%)                |
| Colored/Mixed                            | 4 (2.06%)                        | 14 (0.86%)                   |
| Multiple reported                        | 0 (0.00%)                        | 4 (0.24%)                    |
| Other                                    | 1 (0.52%)                        | 2 (0.12%)                    |
| White                                    | 0 (0.00%)                        | 2 (0.12%)                    |
| Body mass index (BMI)                    |                                  |                              |
| <18.5                                    | 28 (14.43%)                      | 250 (15.28%)                 |
| 18.5-<25                                 | 127 (65.46%)                     | 1147 (70.11%)                |
| 25-<30                                   | 24 (12.37%)                      | 184 (11.25%)                 |
| >=30                                     | 15 (7.73%)                       | 55 (3.36%)                   |
| Region Categorization of Enrollment Site |                                  |                              |
| Central                                  | 153 (78.87%)                     | 851 (52.02%)                 |
| KZN                                      | 12 (6.19%)                       | 525 (32.09%)                 |
| West/East Cape                           | 29 (14.95%)                      | 260 (15.89%)                 |
| Circumcised at baseline                  |                                  |                              |
| Yes                                      | 96 (49.48%)                      | 828 (50.61%)                 |
| No                                       | 90 (46.39%)                      | 611 (37.35%)                 |
| Missing                                  | 8 (4.12%)                        | 197 (12.04%)                 |
| Anal Sex*                                |                                  |                              |
| No                                       | 19 (9.79%)                       | 1546 (94.50%)                |
| Yes                                      | 175 (90.21%)                     | 82 (5.01%)                   |
| Missing                                  | 0 (0.00%)                        | 8 (0.49%)                    |
| Exchange of sex for money/gifts*         |                                  |                              |
| No                                       | 112 (57.73%)                     | 1445 (88.33%)                |
| Yes                                      | 81 (41.75%)                      | 186 (11.37%)                 |
| Missing                                  | 1 (0.52%)                        | 5 (0.31%)                    |
| Sex with Alcohol/Drug Use*               |                                  |                              |
| No                                       | 63 (32.47%)                      | 723 (44.19%)                 |
| Yes                                      | 131 (67.53%)                     | 908 (55.50%)                 |
| Missing                                  | 0 (0.00%)                        | 5 (0.31%)                    |
| Number of sex partners*                  |                                  |                              |
| <=1                                      | 33 (17.01%)                      | 568 (34.72%)                 |
| >=2                                      | 161 (82.99%)                     | 1068 (65.28%)                |
| Married / has main partner+              |                                  |                              |
| Yes                                      | 141 (72.68%)                     | 1383 (84.54%)                |
| No                                       | 52 (26.80%)                      | 198 (12.10%)                 |
| Missing                                  | 1 (0.52%)                        | 55 (3.36%)                   |
| Lives with spouse/main partner+          |                                  |                              |
| Yes                                      | 22 (11.34%)                      | 331 (20.23%)                 |

Table S2: Distribution of baseline variables among MITT males by heterosexual (collected in 702)/no male partner reported (collected in 503/503S) or not heterosexual/male partner(s) reported (*continued*)

| Category                           | Not Heterosexual/Male Partner(s) | Heterosexual/No Male Partner |
|------------------------------------|----------------------------------|------------------------------|
| No                                 | 119 (61.34%)                     | 1051 (64.24%)                |
| Not Applicable                     | 52 (26.80%)                      | 198 (12.10%)                 |
| Missing                            | 1 (0.52%)                        | 56 (3.42%)                   |
| Sex with HIV+ Partner*             |                                  |                              |
| No                                 | 55 (28.35%)                      | 901 (55.07%)                 |
| Yes                                | 139 (71.65%)                     | 732 (44.74%)                 |
| Missing                            | 0 (0.00%)                        | 3 (0.18%)                    |
| Unprotected Sex with HIV+ Partner* |                                  |                              |
| No                                 | 58 (29.90%)                      | 922 (56.36%)                 |
| Yes/Don't Know                     | 3 (1.55%)                        | 19 (1.16%)                   |
| Not Asked                          | 132 (68.04%)                     | 692 (42.30%)                 |
| Missing                            | 1 (0.52%)                        | 3 (0.18%)                    |
| Genital Sores                      |                                  |                              |
| No                                 | 192 (98.97%)                     | 1606 (98.17%)                |
| Yes                                | 2 (1.03%)                        | 28 (1.71%)                   |
| Missing                            | 0 (0.00%)                        | 2 (0.12%)                    |
| Genital Discharge                  |                                  |                              |
| No                                 | 189 (97.42%)                     | 1609 (98.35%)                |
| Yes                                | 4 (2.06%)                        | 24 (1.47%)                   |
| Missing                            | 1 (0.52%)                        | 3 (0.18%)                    |

\* Timeframe for question is previous 30 days in HVTN 702 and previous 6 months in HVTN 503.

+ In HVTN 702, question was introduced after study began and asked retrospectively when required; 48 MITT males were lost to follow-up prior to its introduction in the study.

^ Denominator used for STIs is number of people tested.

<sup>1</sup> \$ Positive for one or more sexually transmitted infection among: Syphilis, Neisseria gonorrhoeae, Chlamydia trachomatis or HSV2

Table S3: Multivariate analysis to characterize association of baseline variables with HIV risk stratified by study and treatment arm. Model fit to complete observed data. All HVTN 702 and HVTN 503/503S follow-up data are included.

| Category                        | HR (95% CI)        | p-value |
|---------------------------------|--------------------|---------|
| Age, years                      |                    |         |
| 18-21                           | 1.58 (0.66- 3.78)  | 0.30    |
| 22-25                           | -                  | -       |
| 26-35                           | 1.68 (0.72- 3.90)  | 0.23    |
| Number of sex partners          |                    |         |
| <=1                             | -                  | -       |
| >=2                             | 1.88 (0.81- 4.34)  | 0.14    |
| Exchange of sex for money/gifts |                    |         |
| No                              | -                  | -       |
| Yes                             | 1.90 (0.86- 4.20)  | 0.11    |
| Anal sex                        |                    |         |
| No                              | -                  | -       |
| Yes                             | 1.42 (0.43- 4.70)  | 0.57    |
| Sex with alcohol/drug use       |                    |         |
| No                              | -                  | -       |
| Yes                             | 1.09 (0.54- 2.20)  | 0.80    |
| Circumcised at baseline         |                    |         |
| Yes                             | -                  | -       |
| No                              | 1.58 (0.79- 3.16)  | 0.20    |
| Heterosexual/no male partner    |                    |         |
| Yes                             | -                  | -       |
| No                              | 11.02 (2.96-40.99) | <0.01   |
| Positive for one or more STIs§  |                    |         |
| No                              | -                  | -       |
| Yes                             | 2.43 (1.20- 4.93)  | <0.05   |

§ Positive for one or more sexually transmitted infections among: Syphilis, Neisseria gonorrhoeae, Chlamydia trachomatis and HSV2

## 5 Super-learner methods and supplementary results

The same variables considered in the regression models we considered as covariates in the nonparametric ensemble-based cross-validated learning, also known as Super-learning, and used to build an HIV risk score. The risk score is defined as the logit of the predicted HIV infection probability from a regression model estimated using the ensemble algorithm Superlearner, where this logit predicted outcome is scaled to have empirical mean zero and empirical standard deviation one.

Super-learning was implemented on each of the 100 imputed datasets. Seven different learners were included in the learner library: a mean model (no predictors), logistic regression, logistic regression with all two-way interactions between variables, logistic regression with lasso penalty implemented using glmnet, logistic generalized additive model implemented using gam, boosted logistic regression implemented using xgboost, and random forest implemented using ranger. All of the selected learners are coded into the SuperLearner R package available on CRAN. The learners all model the HIV outcome as binary and treat censored subjects as HIV-uninfected; this simplification is reasonable given the low HIV incidence, and binary outcome and censored data methods have been seen to produce similar results in other analyses of these data.

The learners were implemented with different approaches to variable pre-screening: all variables eligible for inclusion, including variables with non-zero coefficients in a lasso fit, including variables with univariate Wald test 2-sided p-values in logistic regression  $< 0.10$ , and selecting only one variable at random from amongst a pair of quantitative variables with pairwise Spearman rank correlation  $> 0.90$ . Supplementary Table S4 lists the learner-screen combinations that were considered (14 in total).

For each of the 100 imputed datasets, Superlearner was implemented after pre-scaling each quantitative and ordinal variable to have mean 0 and standard deviation 1. Two levels of cross-validation were used: 1) Outer level: a cross-validated AUC (CV-AUC) was computed over 5-fold cross-validation, and 2) Inner level: 5-fold CV was used to estimate weights associated with each learner in the ensemble. Results were summarized across the 100 imputed datasets using mean, median, and standard deviation.

The weights associated with each constituent learner are reported in Supplementary Table S5. The coefficients of each of the variables in each constituent learner are in Supplementary Table S6.

Classification accuracy of different models was measured using CV-AUC (Hubbard et al., 2016; Williamson et al., 2020) as estimated using the R package vimp available on CRAN. CV-AUC values for constituent learners and the Super-learner model are in Supplementary Table S7 .

To estimate the predictive ability of Superlearner on out-of-sample test data, Super-learning was also implemented on each of the 100 imputed datasets by splitting them randomly into 2:1 train:test sets. Each split was stratified by HIV infection status to ensure 2:1 representation of HIV cases in all train:test sets. The Superlearner model and all constituent learners developed using the training set were subsequently used to predict outcome probability on the test set, and AUC was used to measure performance. Median AUC of the risk score across imputed test sets was 0.688 [95% CI: 0.555 - 0.778], which was comparable to CV-AUC. This suggested that the CV-AUC is a good estimate of out-of-sample performance.

### References

Hubbard, A.E., Khered-Pajouh, S. and van der Laan, M.J. (2016), “Statistical inference for data adaptive target parameters”, *The International Journal of Biostatistics*, 12, 3-19.

Williamson, B.D., Gilbert, P.B., Simon, N.R. and Carone, M. (2020), “A unified approach for inference on algorithm-agnostic variable importance”, arXiv preprint arXiv:2004.03683.

Table S4: All learner-screen combinations (14 in total) used as input to the Superlearner.

| <b>Learner</b>     | <b>Screen*</b>                                          |
|--------------------|---------------------------------------------------------|
| SL.mean            | all                                                     |
| SL.glm             | all<br>glmnet<br>univar_logistic_pval<br>highcor_random |
| SL.glm.interaction | glmnet<br>univar_logistic_pval<br>highcor_random        |
| SL.glmnet          | all                                                     |
| SL.gam             | glmnet<br>univar_logistic_pval<br>highcor_random        |
| SL.xgboost         | all                                                     |
| SL.ranger.imp      | all                                                     |

*Note:*

\*Screen details:

all: includes all variables

glmnet: includes variables with non-zero coefficients in the standard implementation of SL.glmnet that optimizes the lasso tuning parameter via cross-validation

univar\_logistic\_pval: Wald test 2-sided p-value in a logistic regression model  $< 0.10$

highcor\_random: if pairs of quantitative variables with Spearman rank correlation  $> 0.90$ , select one of the variables at random



Table S5: Summary statistics (N, mean, median, standard error, and 95% CI) of weights illustrating which constituent learners of non-zero weights assigned by Superlearner to individual learner-screen combinations when run on full dataset and using HIV-1 status as outcome. The N shows number of imputed datasets (out of 100) that a learner is assigned non-zero weight by the Superlearner. Confidence intervals based on 2.5 and 97.5 quantiles from the weights from the 100 datasets.

| Learner            | Screen                   | N  | Weights |        |            |                |
|--------------------|--------------------------|----|---------|--------|------------|----------------|
|                    |                          |    | Mean    | Median | Std. Error | CI             |
| SL.glmnet          | all                      | 96 | 0.408   | 0.429  | 0.020      | [0.04, 0.706]  |
| SL.glm             | univariate_logistic_pval | 95 | 0.326   | 0.282  | 0.020      | [0.04, 0.76]   |
| SL.xgboost         | all                      | 62 | 0.155   | 0.127  | 0.013      | [0.006, 0.431] |
| SL.mean            | all                      | 45 | 0.070   | 0.066  | 0.004      | [0.01, 0.141]  |
| SL.gam             | univariate_logistic_pval | 41 | 0.167   | 0.155  | 0.009      | [0.009, 0.315] |
| SL.glm.interaction | highcor_random           | 39 | 0.022   | 0.020  | 0.001      | [0.002, 0.058] |
| SL.glm.interaction | univariate_logistic_pval | 30 | 0.042   | 0.036  | 0.003      | [0.003, 0.114] |
| SL.glm.interaction | glmnet                   | 24 | 0.126   | 0.098  | 0.013      | [0.006, 0.468] |
| SL.glm             | all                      | 23 | 0.143   | 0.109  | 0.011      | [0.012, 0.342] |
| SL.glm             | glmnet                   | 7  | 0.133   | 0.104  | 0.006      | [0.068, 0.22]  |
| SL.gam             | glmnet                   | 6  | 0.121   | 0.096  | 0.006      | [0.068, 0.217] |
| SL.ranger.imp      | all                      | 4  | 0.048   | 0.044  | 0.003      | [0.019, 0.083] |

Table S6: Summary statistics (N, mean, median, standard error, and 95% CI) of the odds ratio of predictors in learners assigned weight  $> 0.0$  by Superlearner in any of the 100 imputed datasets. Randomforest and xgboost results reported separately. N learner indicates number of datasets for which the weight was non-zero for the particular constituent learner. N predictor indicates number of datasets for which the weight was non-zero and the predictor was also given a non-zero estimate. Confidence intervals based on 2.5 and 97.5 quantiles.

| Learner   | Screen                   | Predictors           | Max Weight | N       |           |       |        |            | Odds Ratio     |  |  |
|-----------|--------------------------|----------------------|------------|---------|-----------|-------|--------|------------|----------------|--|--|
|           |                          |                      |            | learner | predictor | Mean  | Median | Std. Error | CI             |  |  |
| SL.glmnet | all                      | hetero               | 0.828      | 96      | 96        | 0.29  | 0.251  | 0.016      | [0.157, 1]     |  |  |
| SL.glmnet | all                      | anysti               | 0.828      | 96      | 73        | 1.487 | 1.377  | 0.047      | [1, 2.447]     |  |  |
| SL.glmnet | all                      | circ                 | 0.828      | 96      | 60        | 0.886 | 0.929  | 0.014      | [0.541, 1]     |  |  |
| SL.glmnet | all                      | malepart             | 0.828      | 96      | 28        | 1.202 | 1.000  | 0.061      | [0.965, 3.205] |  |  |
| SL.glmnet | all                      | hsv2                 | 0.828      | 96      | 22        | 1.3   | 1.000  | 0.087      | [1, 3.519]     |  |  |
| SL.glmnet | all                      | npartm               | 0.828      | 96      | 12        | 1.044 | 1.000  | 0.016      | [1, 1.457]     |  |  |
| SL.glmnet | all                      | mainprt              | 0.828      | 96      | 12        | 0.977 | 1.000  | 0.007      | [0.759, 1]     |  |  |
| SL.glmnet | all                      | gensor               | 0.828      | 96      | 11        | 1.084 | 1.000  | 0.032      | [1, 2.069]     |  |  |
| SL.glmnet | all                      | regcatKZN            | 0.828      | 96      | 11        | 0.985 | 1.000  | 0.005      | [0.791, 1]     |  |  |
| SL.glmnet | all                      | raceBlack            | 0.828      | 96      | 11        | 0.978 | 1.000  | 0.008      | [0.776, 1]     |  |  |
| SL.glmnet | all                      | exchsx               | 0.828      | 96      | 9         | 1.019 | 1.000  | 0.008      | [1, 1.278]     |  |  |
| SL.glmnet | all                      | sxhivp               | 0.828      | 96      | 9         | 0.97  | 1.000  | 0.011      | [0.546, 1]     |  |  |
| SL.glmnet | all                      | bmicatgte30          | 0.828      | 96      | 3         | 0.997 | 1.000  | 0.002      | [0.973, 1]     |  |  |
| SL.glmnet | all                      | analsx               | 0.828      | 96      | 3         | 0.99  | 1.000  | 0.007      | [1, 1]         |  |  |
| SL.glmnet | all                      | regcatWest_EastCape  | 0.828      | 96      | 1         | 1     | 1.000  | -          | -              |  |  |
| SL.glmnet | all                      | bmicat25_It30        | 0.828      | 96      | 1         | 0.999 | 1.000  | -          | -              |  |  |
| SL.glm    | univariate_logistic_pval | anysti               | 0.807      | 95      | 95        | 2.193 | 2.135  | 0.067      | [1, 3.51]      |  |  |
| SL.glm    | univariate_logistic_pval | npartm               | 0.807      | 95      | 95        | 1.573 | 1.569  | 0.02       | [1, 1.914]     |  |  |
| SL.glm    | univariate_logistic_pval | exchsx               | 0.807      | 95      | 95        | 1.205 | 1.196  | 0.011      | [1, 1.455]     |  |  |
| SL.glm    | univariate_logistic_pval | livwprtNotApplicable | 0.807      | 95      | 95        | 0.833 | 1.000  | 0.041      | [0.125, 1]     |  |  |
| SL.glm    | univariate_logistic_pval | mainprt              | 0.807      | 95      | 95        | 0.758 | 0.760  | 0.012      | [0.57, 1]      |  |  |
| SL.glm    | univariate_logistic_pval | regcatKZN            | 0.807      | 95      | 95        | 0.588 | 0.569  | 0.01       | [0.5, 1]       |  |  |
| SL.glm    | univariate_logistic_pval | analsx               | 0.807      | 95      | 95        | 0.482 | 0.452  | 0.017      | [0.286, 1]     |  |  |
| SL.glm    | univariate_logistic_pval | hetero               | 0.807      | 95      | 95        | 0.201 | 0.150  | 0.02       | [0.041, 1]     |  |  |
| SL.glm    | univariate_logistic_pval | circ                 | 0.807      | 95      | 92        | 0.577 | 0.549  | 0.015      | [0.398, 1]     |  |  |
| SL.glm    | univariate_logistic_pval | malepart             | 0.807      | 95      | 78        | 1.51  | 1.098  | 0.104      | [0.596, 4.382] |  |  |
| SL.glm    | univariate_logistic_pval | hsv2                 | 0.807      | 95      | 77        | 1.805 | 1.397  | 0.139      | [0.331, 4.736] |  |  |
| SL.glm    | all                      | gensor               | 0.380      | 23      | 23        | 1.495 | 1.000  | 0.096      | [1, 3.781]     |  |  |
| SL.glm    | all                      | npartm               | 0.380      | 23      | 23        | 1.211 | 1.000  | 0.041      | [1, 2.203]     |  |  |
| SL.glm    | all                      | anysti               | 0.380      | 23      | 23        | 1.202 | 1.000  | 0.045      | [1, 2.312]     |  |  |
| SL.glm    | all                      | exchsx               | 0.380      | 23      | 23        | 1.106 | 1.000  | 0.023      | [1, 1.777]     |  |  |
| SL.glm    | all                      | regcatWest_EastCape  | 0.380      | 23      | 23        | 1.026 | 1.000  | 0.006      | [1, 1.183]     |  |  |
| SL.glm    | all                      | agecatf226_35        | 0.380      | 23      | 23        | 1.007 | 1.000  | 0.005      | [0.886, 1.142] |  |  |
| SL.glm    | all                      | livwprtNotApplicable | 0.380      | 23      | 23        | 1     | 1.000  | 0          | [1, 1]         |  |  |
| SL.glm    | all                      | bmicatgte30          | 0.380      | 23      | 23        | 0.955 | 1.000  | 0.015      | [0.497, 1.055] |  |  |
| SL.glm    | all                      | mainprt              | 0.380      | 23      | 23        | 0.942 | 1.000  | 0.012      | [0.627, 1]     |  |  |
| SL.glm    | all                      | regcatKZN            | 0.380      | 23      | 23        | 0.926 | 1.000  | 0.014      | [0.629, 1]     |  |  |

Table S6: Summary statistics (N, mean, median, standard error, and 95% CI) of the odds ratio of predictors in learners assigned weight  $> 0.0$  by Superlearner in any of the 100 imputed datasets. Randomforest and xgboost results reported separately. N learner indicates number of datasets for which the weight was non-zero for the particular constituent learner. N predictor indicates number of datasets for which the weight was non-zero and the predictor was also given a non-zero estimate. Confidence intervals based on 2.5 and 97.5 quantiles. (continued)

| Learner | Screen | Predictors      | Max Weight | learner | predictor | Mean  | Median | Std. Error | CI             |
|---------|--------|-----------------|------------|---------|-----------|-------|--------|------------|----------------|
| SL.glm  | all    | bmicat25_lt30   | 0.380      | 23      | 23        | 0.921 | 1.000  | 0.015      | [0.58, 1]      |
| SL.glm  | all    | circ            | 0.380      | 23      | 23        | 0.89  | 1.000  | 0.021      | [0.41, 1]      |
| SL.glm  | all    | raceBlack       | 0.380      | 23      | 23        | 0.888 | 1.000  | 0.021      | [0.441, 1]     |
| SL.glm  | all    | analsx          | 0.380      | 23      | 23        | 0.874 | 1.000  | 0.025      | [0.292, 1]     |
| SL.glm  | all    | sxhivp          | 0.380      | 23      | 23        | 0.845 | 1.000  | 0.031      | [0, 1]         |
| SL.glm  | all    | hetero          | 0.380      | 23      | 23        | 0.801 | 1.000  | 0.037      | [0.061, 1]     |
| SL.glm  | all    | hsv2            | 0.380      | 23      | 22        | 1.407 | 1.000  | 0.125      | [0.914, 6.112] |
| SL.glm  | all    | malepart        | 0.380      | 23      | 21        | 1.062 | 1.000  | 0.037      | [0.459, 2.237] |
| SL.glm  | all    | agecatf222_25   | 0.380      | 23      | 10        | 0.98  | 1.000  | 0.006      | [0.765, 1]     |
| SL.glm  | all    | usxhivpNotAsked | 0.380      | 23      | 9         | >1000 | 1.000  | >1000      | [1, >1000]     |
| SL.glm  | all    | livwprtYes      | 0.380      | 23      | 5         | 1.011 | 1.000  | 0.005      | [1, 1.193]     |
| SL.glm  | all    | usxalc          | 0.380      | 23      | 2         | 0.994 | 1.000  | 0.004      | [1, 1]         |

Table S7: Summary statistics (mean, median, standard error, and 95% CI) of CV-AUCs illustrating performance of Superlearner and all learner-screen combinations from the imputed datasets (N=100) for risk score analyses using the full dataset set and HIV-1 status as outcome. Confidence intervals based on 2.5 and 97.5 quantiles from the CV-AUCs from the 100 datasets.

| Learner            | Screen               | CV-AUC |        |            |                |
|--------------------|----------------------|--------|--------|------------|----------------|
|                    |                      | Mean   | Median | Std. Error | CI             |
| SL.gam             | univar_logistic_pval | 0.718  | 0.716  | 0.002      | [0.679, 0.77]  |
| SL.glm             | univar_logistic_pval | 0.718  | 0.716  | 0.002      | [0.679, 0.77]  |
| SL                 | -                    | 0.703  | 0.702  | 0.003      | [0.649, 0.759] |
| SL.glm             | all                  | 0.702  | 0.702  | 0.002      | [0.663, 0.75]  |
| SL.gam             | highcor_random       | 0.699  | 0.698  | 0.002      | [0.661, 0.747] |
| SL.glm             | highcor_random       | 0.699  | 0.698  | 0.002      | [0.661, 0.747] |
| Discrete SL        | -                    | 0.697  | 0.697  | 0.003      | [0.646, 0.751] |
| SL.glmnet          | all                  | 0.696  | 0.690  | 0.003      | [0.644, 0.751] |
| SL.xgboost         | all                  | 0.696  | 0.693  | 0.003      | [0.651, 0.752] |
| SL.gam             | glmnet               | 0.688  | 0.685  | 0.003      | [0.639, 0.748] |
| SL.glm             | glmnet               | 0.688  | 0.685  | 0.003      | [0.639, 0.748] |
| SL.glm.interaction | glmnet               | 0.655  | 0.658  | 0.003      | [0.586, 0.711] |
| SL.ranger.imp      | all                  | 0.631  | 0.628  | 0.003      | [0.584, 0.692] |
| SL.glm.interaction | univar_logistic_pval | 0.598  | 0.601  | 0.004      | [0.514, 0.669] |
| SL.glm.interaction | highcor_random       | 0.508  | 0.509  | 0.003      | [0.452, 0.563] |
| SL.mean            | all                  | 0.500  | 0.500  | -          | -              |
